1     **The ratio of interacting miRNAs' expressions is a robust biomarker**  
2                     **for disease classification in multi-center data**

3     Yonghao Zhang<sup>a,#</sup>, Cuidie Ma<sup>a,#</sup>, Rui Ding<sup>b</sup>, Han Chen<sup>c</sup>, Lida Xu<sup>d,\*</sup>, Changyuan Yu<sup>a,\*</sup>

4     a, College of Life Science and Technology, Beijing University of Chemical Technology,  
5     Beijing, China

6     b, Department of Laboratory Medicine, State Key Laboratory of Complex Severe and  
7     Rare Diseases, Peking Union Medical College Hospital, Chinese Academy of Medical  
8     Science and Peking Union Medical College, Beijing, China

9     c, Shenyang Medical College, Shenyang, China

10    d, Beijing Glyexo Gene Technology Co., Ltd., Beijing, China

11    # These authors contributed equally to this work

12    \* Corresponding authors: Lida Xu, [lida.xu@hotgen.com.cn](mailto:lida.xu@hotgen.com.cn); Changyuan Yu,  
13    [Yucy@mail.buct.edu.cn](mailto:Yucy@mail.buct.edu.cn)

14

15

16

17

18

19

20

## 21 **Abstract**

### 22 **Background**

23 Many miRNA-based diagnostic models have been constructed to distinguish  
24 diseased individuals. However, due to the inherent differences across different platforms  
25 or within multi-center data, the models usually fail in the generalization for medical  
26 application.

### 27 **Results**

28 Here, we proposed to use the within-sample expression ratios of related miRNA  
29 pairs as markers, by utilizing the internal miRNA: miRNA interactions. The ratio of the  
30 expression values between each miRNA pair turned out to be more stable cross multiple  
31 data source. Moreover, we adopted the genetic algorithm to solve the curse of dimensions  
32 when exploring the features.

### 33 **Conclusions**

34 The application results on three example datasets demonstrated that the expression  
35 ratio of interacting miRNA pair is a promising type of biomarker, which is insensitive to  
36 batch effects and has better performance in disease classifications.

37 **Keywords:** biomarker, miRNA interactions, batch effect, multi-center data, disease  
38 classifications

39

## 40 **Introductions**

41 MicroRNAs (miRNAs) have emerged as valuable biomarkers for the early diagnosis  
42 of diseases due to their tissue-specific expression profiles and better specificity [1].  
43 However, the expression levels of miRNAs may vary across different platforms or  
44 protocols, which limits the application of diagnostic models. This phenomenon, known

45 as batch variance, is prevalent in all types of high-throughput biological platforms[2], and  
46 exists commonly in multi-center data[3–6]. The difference in data distribution from  
47 multiple centers is an obstacle to obtaining reliable conclusions in joint analysis, and it  
48 prevents the models learned in one dataset from working in other external datasets[3,7,8].  
49 Thus, effectively handling batch effects in the integration of different datasets is one of  
50 the frontiers in large-scale biological data analysis[9].

51 Several batch effect correction methods have been developed to facilitate the joint  
52 use of multi-center data. For example, the ‘ComBat-seq’ tool based on the negative  
53 binomial regression model was developed specifically for RNA-seq count data[10]; the  
54 ‘removeBatchEffect’ function in ‘limma’ package can be used to correct the data variation  
55 caused by the batch effects[11]. However, these correction methods force the data shapes  
56 to be transformed artificially, which may introduce false discoveries[12] In contrast, the  
57 intrinsic regulatory pathways are not affected by experimental conditions, which makes  
58 the relationships between genes have the potential to be a type of normalizer-free and  
59 batch-insensitive markers. Under this consideration, we propose the ratio of the  
60 expression values between related miRNAs (ERRmiR) as a promising novel form of  
61 biomarkers for facilitating aggregation analysis of data from multiple sources.

62 To discover ERRmiR features with biological significance, a miRNA interaction  
63 network is needed as prior knowledge. It is widely known that miRNAs not only regulate  
64 the expression of mRNAs but also target non-coding RNAs, including long non-coding  
65 RNAs and miRNAs[13]. miRNAs can directly bind to the 3’UTR of transcription factors

66 (TF), which can also reversely activate or repress miRNA expressions [14]. For example,  
67 miR-181b affects the expression of miR-21 through the transcription factor FOS, a critical  
68 signaling protein for glioma progression[15]; miR-660-5p has been reported to control  
69 the expression of miR-486-5p via mouse double minute2 (MDM2) and p53 (also known  
70 as TP53) in a study of lung cancer[16]. A recent review also summarizes numerous  
71 examples of miRNA-TF and TF-miRNA interactions in various cancers, demonstrating  
72 the importance of the interaction between miRNA and pluripotent transcription factor in  
73 determining the occurrence of human cancers[14]. All these examples provide important  
74 clues for understanding the role of the TF-mediated miRNA functional network in tumor  
75 regulation.

76 In this study, we constructed a TF-mediated miRNA interaction network using public  
77 databases and demonstrated that the ERRmiR features were relatively insensitive to batch  
78 effects in multi-center studies. We then adopted a genetic algorithm in the feature  
79 screening process to avoid the dimension curse, which had a great capacity for selecting  
80 markers with stable performances in developing diagnostic models. Lastly, we used three  
81 independent examples involving plasma and tissue samples to illustrate this method and  
82 exhibit its effects.

## 83 **Materials and methods**

### 84 **Construction of miRNA interaction network**

85 The TF-mediated miRNA: miRNA interaction network was constructed by  
86 combining the data of miRNA-TF and TF-miRNA relationships. If a transcription factor

87 regulated by miRNA\_a was able to regulate miRNA\_b, miRNA\_a was assumed to be  
88 able to influence miRNA\_b. Then, they were connected in the miRNA interaction  
89 network.

90 The data of those relationships were collected from several public databases. The  
91 microRNA-target interactions validated experimentally were collected from miRTarBase  
92 [17], among which 8014 targets were recognized as transcription factors based on the  
93 hTFtarget[18] and AnimalTFDB[19] databases. On the other hand, 1266 records of  
94 transcription factors regulating precursor miRNAs were obtained from the TransmiR[20]  
95 v2.0 database. Combining these two parts of data, a total of 51,770 miRNA:pre-miRNA  
96 indirect interactions were obtained. Then pre-miRNAs were mapped to mature miRNAs  
97 according to the mirbase gff3 file. Finally, the miRNA: miRNA interaction network  
98 included 75,507 unique records of the indirect interaction relationships.

### 99 **Feature generation**

100 Features were generated by calculating the ratio of expression values between each  
101 related miRNA pair in the miRNA interaction network constructed above. miRNAs were  
102 filtered based on an expression threshold of 100 to ensure that miRNAs could be detected  
103 stably. To avoid the divisor being zero, the denominator was added by one. The feature  
104 constructed with the connected pair of miRNA\_a and miRNA\_b was denoted as  
105 ERRmiR(a,b), then the formula was as follows:

$$106 \quad ERRmiR(a,b) = \frac{Expression\ of\ miRNA_a}{Expression\ of\ miRNA_b + 1}$$

---

## 107 Data collection and pre-processing

108 The data used to display the robustness of ERRmiR features on multi-source data  
109 from different library preparation kits were obtained from GSE133719 and GSE141658  
110 datasets on Gene Expression Omnibus (GEO)[21] database. Three examples, including  
111 SARS-CoV-2-19, RCC, and LUAD projects, were used to verify the method in this study.  
112 Data of the three projects were collected from the NCI Genomic Data Commons  
113 (GDC)[22] database and GEO (detailed in **Table1**). The miRNA expression matrices in  
114 the CPTAC[23]/TCGA[24] database were downloaded using the GDC tool. ExceRpt[25]  
115 was used to perform annotation and quantification of the raw data from GEO to obtain  
116 the expression matrices of miRNAs. For comparison of the results among different  
117 datasets within the same project, counts of reads were uniformly converted to RPM (reads  
118 per million mapped reads) values. In the SARS-CoV-2 project, the plasma of persons with  
119 non-severe symptoms (mild patients and healthy) were used as the controls, and the  
120 plasma of those with serious symptoms were used as the disease samples. In the RCC and  
121 LUAD projects, normal tissues were used as the controls, and primary tumor tissues were  
122 used as the disease samples.

123

124 **Table1:** Sample information in detail

| Project    | Dataset     | Number of control cases | Number of disease cases | Platform             | Source |
|------------|-------------|-------------------------|-------------------------|----------------------|--------|
| SARS-CoV-2 | GSE178246*  | 272                     | 264                     | Illumina NextSeq 500 | Plasma |
|            | GSE176498   | 29                      | 16                      | Illumina NextSeq 550 | Plasma |
| RCC        | CPTAC-3-RCC | 148                     | 311                     | Illumina             | tissue |
|            | TCGA-KIRP   | 34                      | 34                      | Illumina HiSeq 2000  | tissue |
|            | GSE109368   | 12                      | 12                      | Illumina NextSeq 500 | tissue |

---

|      |              |     |     |                     |        |
|------|--------------|-----|-----|---------------------|--------|
| LUAD | CPTAC-3-LUAD | 102 | 111 | Illumina            | tissue |
|      | GSE110907    | 48  | 48  | Illumina HiSeq 2000 | tissue |
|      | GSE196633    | 10  | 10  | Illumina HiSeq 2500 | tissue |

---

125 \* In this data set, each sample has four pieces of sequencing data, which were treated as four cases.

## 126 **Feature screening and classification modelling**

127 In each project, the dataset with the most samples was divided into a training set and  
128 a test set proportionally and randomly according to 0.75:0.25, and the training set was  
129 used to perform target screening. Univariate screening of the ERRmiR features was  
130 performed based on the foldchange of the mean expression in diseased samples compared  
131 to that in the controls and the p-adjust value of t-test between the two groups. The 'sklearn-  
132 genetic' package was used parallel for 100 times to obtain the optimal subsets of features.  
133 The features with higher appearance frequencies in the optimal subsets were selected as  
134 targets for the disease.

135 The 'scikit-learn' package was used to build models for disease classifications.  
136 During model training, the learning curves were used to detect whether the estimator was  
137 overfitting. The trained model was validated on a test set and other external validation  
138 datasets within the same project.

## 139 **Statistical analysis and visualization**

140 The quartile plots of miRNA expression / ERRmiR feature values were drawn by  
141 the 'matplotlib' tool. The significance analyses were conducted using 'scipy'. The miRNA  
142 network was visualized using 'pyvis' and 'seaborn' tools. In miRNA pathway enrichment  
143 analyses, target genes of miRNAs were first identified through the database 'tarbase' using

144 the 'multMiR' package in R language, then pathway enrichments were performed using  
145 'clusterProfiler'.

## 146 **Results**

### 147 **The schematic of ERRmiR signatures generation and screening**

148 We developed a screening process for ERRmiR signature generation based on  
149 machine learning methods (Figure 1). We first constructed a miRNA interaction network  
150 by integrating several databases, including miRTarBase, hTFtarget, AnimalTFDB, and  
151 TransmiR v2.0. The network contained 75,507 unique records of indirect interaction  
152 relationships between miRNAs. We then calculated the expression ratios of related  
153 miRNA pairs as ERRmiR features. The screening dataset was randomly divided into a  
154 training set and a test set, and the features were filtered in the training set using univariate  
155 analyses such as t-test and the foldchange of the mean expressions between two groups.  
156 We used a genetic algorithm to screen the features, and those with higher frequencies in  
157 the screening processes were selected as candidate markers. The trained model was  
158 validated on the test set within the same screening dataset and evaluated on external  
159 validation datasets. This approach was suitable for discovering biomarkers for various  
160 samples.



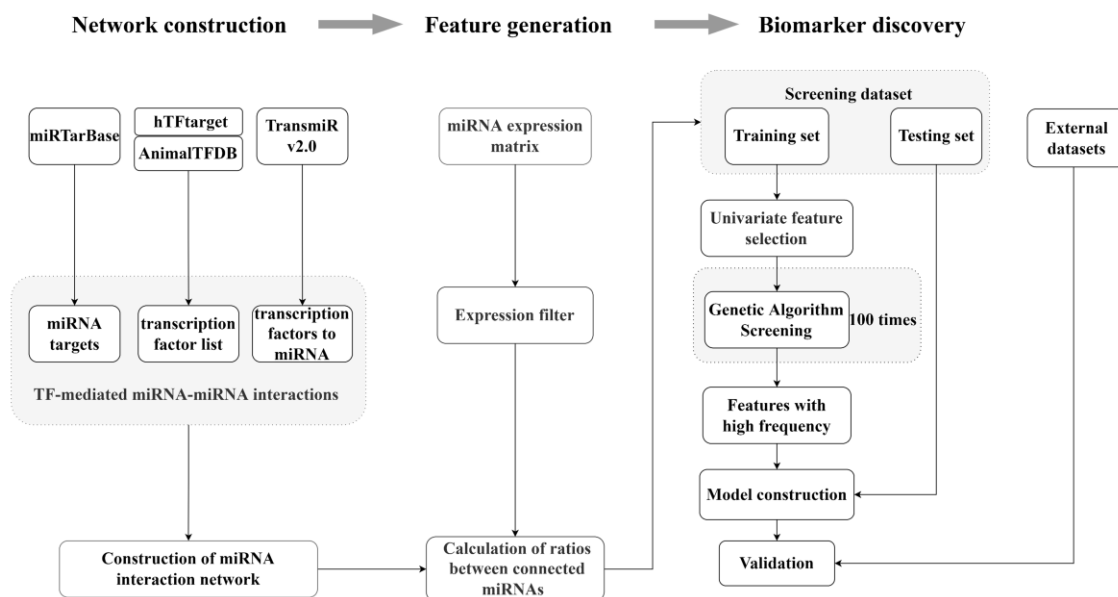

161

162 **Figure 1:** Overview of the ERRmiR marker discovery process. First, the miRNA network  
 163 was constructed based on the TF-mediated interactions. Then, the ERRmiR features were  
 164 calculated between the connected genes in the network as new variables for subsequent  
 165 process. Finally, target screening and model construction were performed on the  
 166 screening dataset and verified on the validation dataset.

### 167 Construction of a miRNA interaction network

168 We constructed a miRNA interaction network based on indirect interactions  
 169 mediated by transcription factors. The interactions mediated by transcription factors,  
 170 induce the expression of one miRNA to impact the activation or inhibition of other  
 171 miRNAs. Take miR-183-5p as an example to show how miRNAs regulate other miRNAs  
 172 through transcription factors (**Figure 2A**). Here the pentagram-labeled miR-183-5p is a  
 173 regulatory miRNA, which regulates the square-labeled transcription factors and further  
 174 affects the round-labeled target miRNAs. The blue linkages represented the interaction of

175 miR-183-5p acting on the transcription factors, and the pink linkages represented the  
 176 effects of transcription factors on other miRNAs. The network contained 75,507 unique  
 177 records of indirect interaction relationships between miRNAs. The miRNA interaction  
 178 network was visualized, and its degree distribution and several topological characteristics  
 179 were presented in **Figure 2B** and **Figure 2C**.

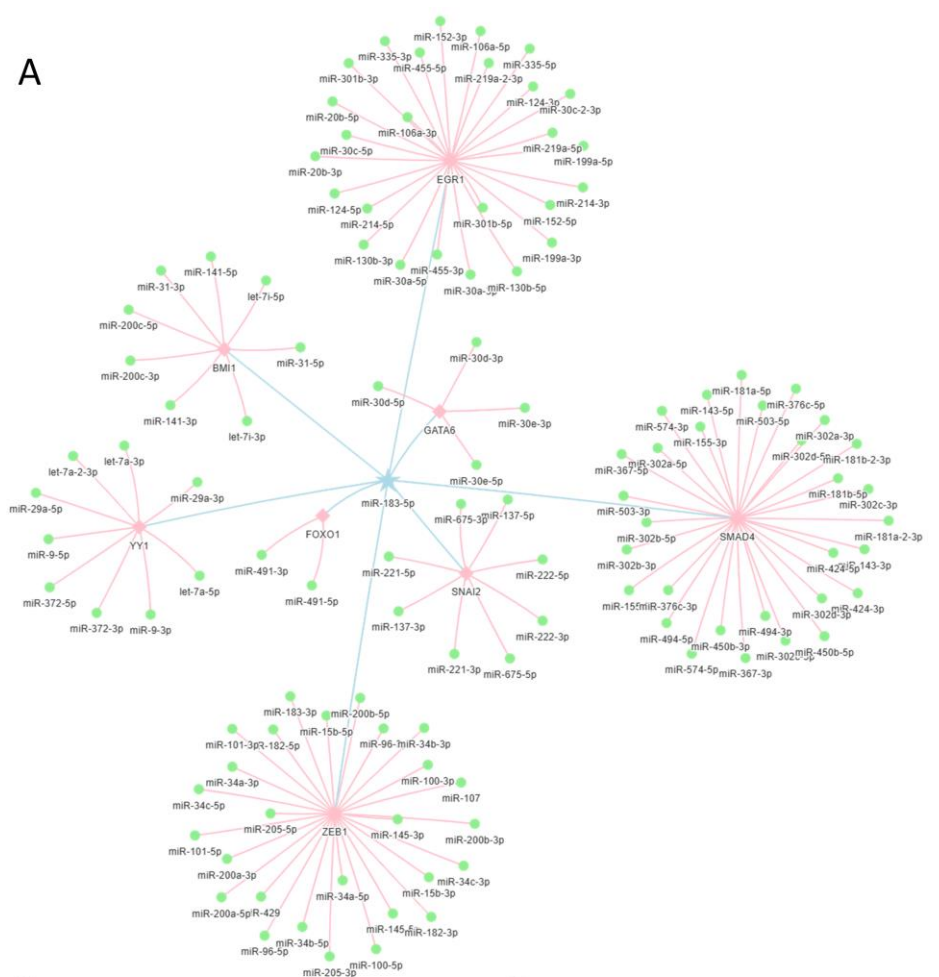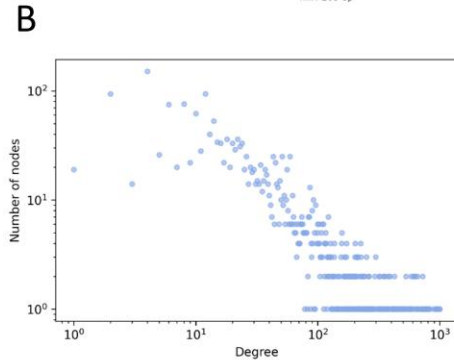

**C**

|                       |             |
|-----------------------|-------------|
| Number of nodes       | 2196        |
| Number of edges       | 75507       |
| Network density       | 0.031       |
| Network diameter      | 4           |
| Degree (min-mean-max) | 1-68.77-889 |

181 **Figure 2:** Illustration of the miRNA interaction network. (A) TF-mediated miRNA:  
182 miRNA indirect interactions. Pentagrams denoted the regulating miRNAs, squares  
183 denoted the transcription factors, and rounds denoted the regulated miRNAs. (B) Degree  
184 distribution of the miRNA interaction network followed a power-law tail. (C) Topological  
185 characteristics of the interaction network.

186

### 187 **Characterization of ERRmiR signatures**

188 To verify the hypothesis that the expression ratios between interacted miRNAs  
189 would be more stable across multi-center data, the distribution of ERRmiR values was  
190 displayed compared to the distribution of the miRNA expression levels of the same  
191 samples (**Figure 3**). The experiment was about the sequencing data of the peripheral  
192 blood CD8<sup>+</sup> T cells in triplicate from rheumatoid arthritis (RA) patients and healthy  
193 controls, by parallel receiving different library construction methods. The Quartile plots  
194 showed that the original miRNA expression data generated by different library  
195 preparation kits had significant differences on the scale and distributions (**Figure 3**, upper  
196 panel), while the distribution variation of ERRmiR values decreased (**Figure 3**, lower  
197 panel), which demonstrated the potential of ERRmiR features as batch-insensitive  
198 markers. We presented three application examples from various sample types and diseases.

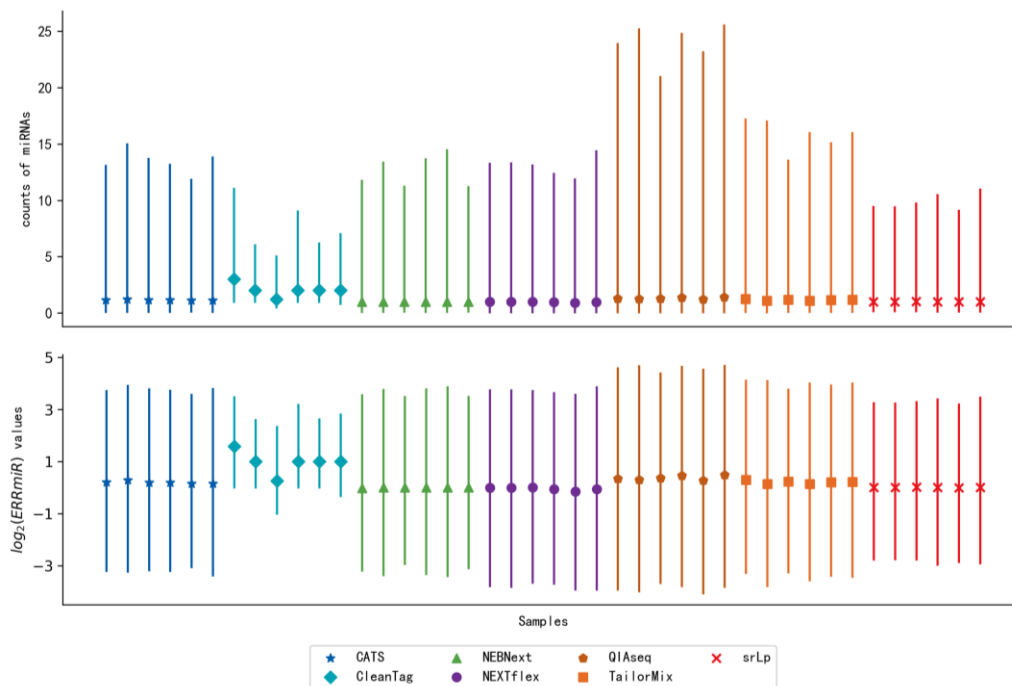

199

200 **Figure 3:** Quartile plots of miRNA expression (upper panel) and log<sub>2</sub>-ratios of every two  
201 miRNAs (below panel) for each sample. Each plot was represented with the median (a  
202 solid point), the 0.25 quartile and the 0.75 quartile of the distribution.

203

### 204 **Example 1: Classification of COVID-19 patients with severe symptoms using plasma** 205 **samples**

206 The advantage of ERRmiR features was first compared to the miRNA expression  
207 values on the dataset of COVID-19 plasma samples. The dataset GSE178246 was divided  
208 into a training set and a test set randomly, and the dataset GSE176498 was used as the  
209 external independent validation set. According to the protocol, there were 42 ERRmiR  
210 targets in total obtained during conducting the genetic algorithm for 100 times on the  
211 screening dataset. As shown in **Figure 4A**, the frequency distribution of target appearance  
212 was very steep: the highest frequency was up to 60, but there were only three targets with

213 frequencies greater than 10. We selected the top 3 high-frequency features as markers,  
214 and tested them on the validation set. As expected, they were significantly different  
215 between the serious and non-serious groups ( $P < 0.05$ ) and showed relatively consistent  
216 trends across multiple datasets (**Figure 4B**). Based on these markers, an SVC model that  
217 was established on the training set, showed stable high performances on both the test set  
218 and the validation dataset (**Figure 4D**). To confirm the batch-insensitive nature of the  
219 ERRmiR features, the protocol of biomarker selection was also used on the expression  
220 matrix of miRNAs directly. As displayed in **Figure 4C**, the targets screened from the  
221 expression matrix of miRNAs lost effectiveness across batches of data, with miR-1224-  
222 5p even showing opposite regulation trends. Accordingly, the model with miRNA  
223 expression values had a high AUC of 0.906 on the test set, but failed on the independent  
224 validation set with an AUC of 0.783 (**Figure 4E**). In addition, the five miRNAs that  
225 comprised the three ERRmiR markers were used for pathway enrichment, and the top 20  
226 pathways were shown in Figure 4F. Infection pathways of bacteria and viruses, including  
227 Salmonella infection and Human papillomavirus infection, were significantly enriched.

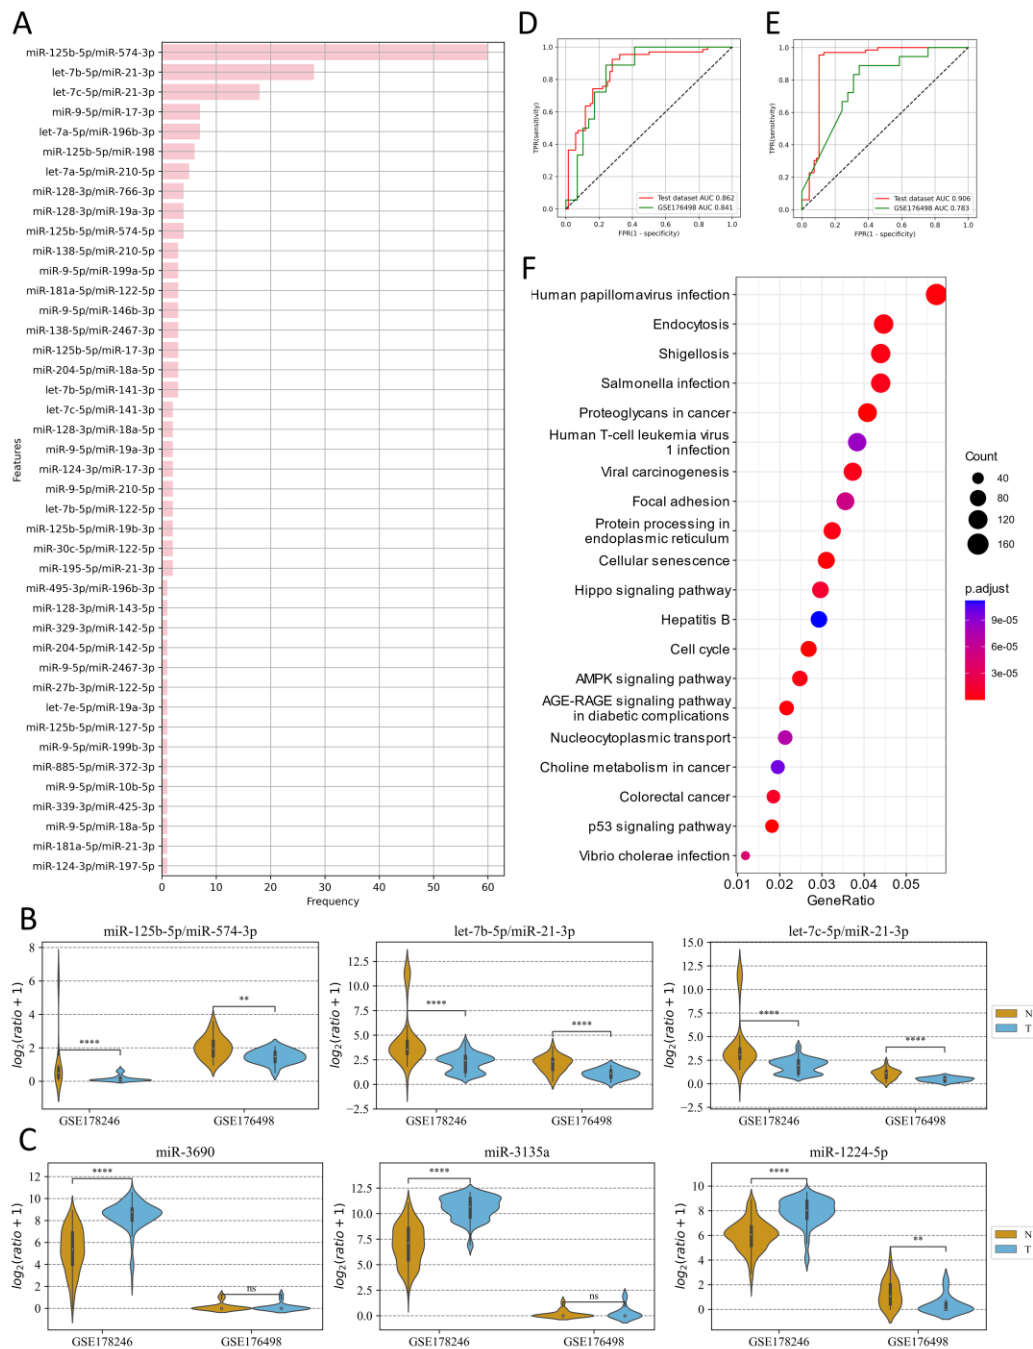

228

229 **Figure 4:** Analysis of ERRmiR features in the SARS-CoV-2 project. (A) The occurrence

230 frequencies of the ERRmiR features in the 100 times genetic algorithm. (B-C) the top 3

231 high-frequency ERRmiRs showed relatively stable regulatory trend in both datasets rather

232 than miRNAs. ROC curves of the models based on ERRmiR markers (D) and miRNA

233 markers (E). (F) Pathway enrichment analysis of miRNAs involved in ERRmiR markers.

## 234 **Example 2: Diagnostic model of RCC using tissue samples**

235 The strategy of marker discovery was also validated on the dataset of RCC tissue  
236 samples. Data from CPTAC-RCC dataset were used for screening targets and building  
237 the model. The TCGA-KIRP and GSE109368 datasets were used for external validations.  
238 After conducting the genetic algorithm, we obtained 115 targets with the frequency  
239 distribution shown in **Figure 5A**. As the same as in Example 1, the top 3 high-frequency  
240 ERRmiR features were selected as biomarkers, and presented significant differences  
241 between the cancer and control groups ( $P < 0.05$ ) with consistent regulation trends across  
242 multiple datasets (**Figure 5B**). Although part of the miRNAs in ERRmiR markers, such  
243 as miR-221-3p and miR-221-5p, didn't display significant differential between the two  
244 sample groups in all the datasets (**Figure 5C**). A prediction model using the SVC  
245 algorithm was established on the screening dataset, and was able to achieve high AUC  
246 values on both two independent validation datasets (**Figure 5D**). The five miRNAs  
247 comprising the three ERRmiR markers were significantly enriched in several pathways  
248 associated with cancers (**Figure 5E**). Especially the p53 signaling pathway, and Hippo  
249 signaling pathway had been widely reported to be associated with RCC[26,27].

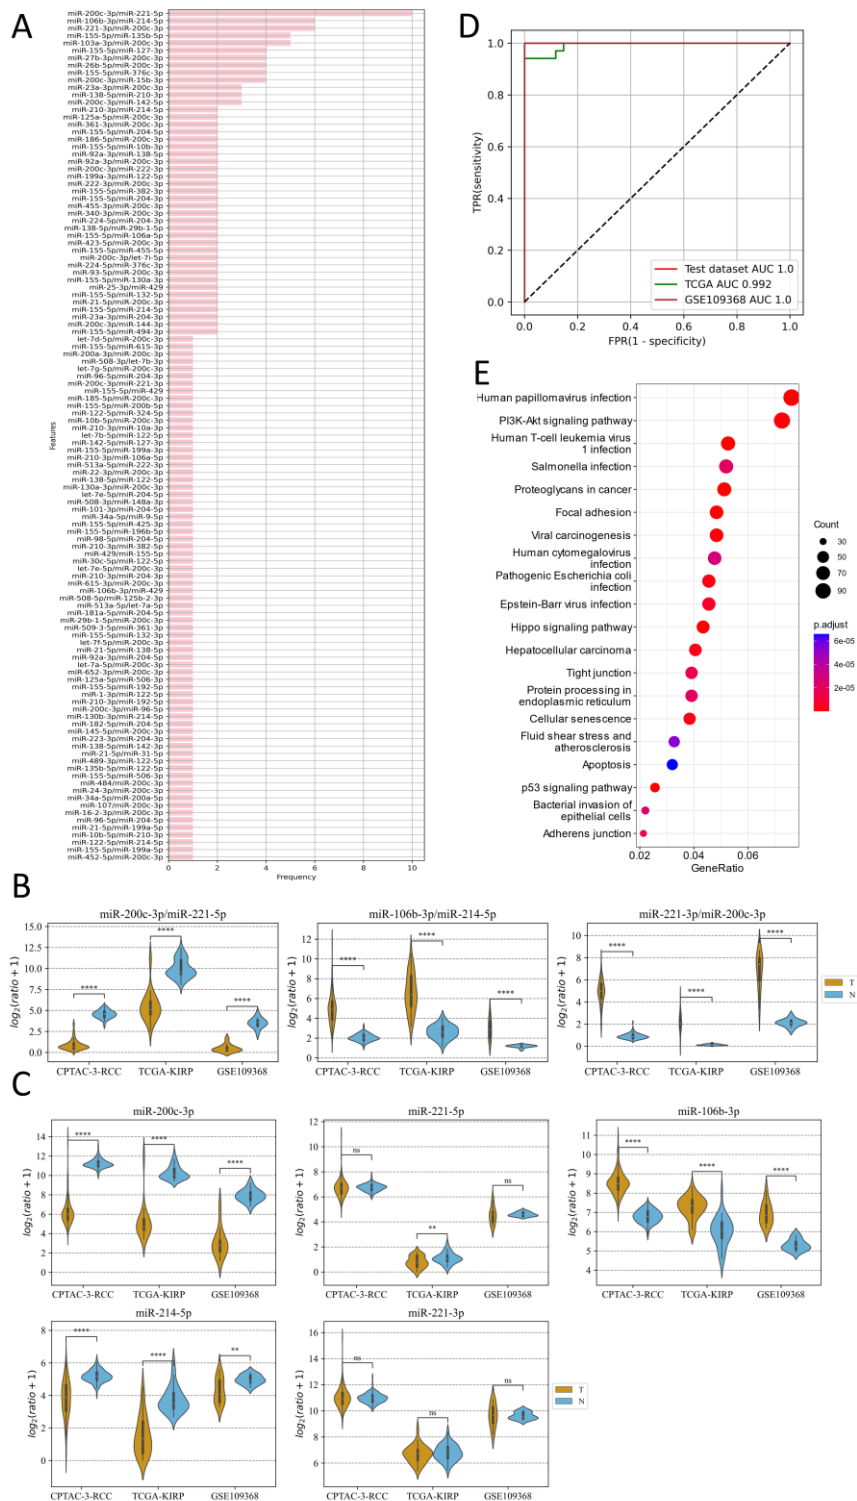

250

251 **Figure 5:** ERRmiR markers discovered in the RCC project. (A) Statistics of the  
252 frequencies of the ERRmiR features. Violin plots of the top 3 high-frequency ERRmiR  
253 features (B) and the miRNAs involved in them (C) among the three independent datasets.



254 (D) ROC curves of the model based on the ERRmiR markers. (E) Pathway enrichment  
255 analysis of miRNAs in the ERRmiR markers.

256

### 257 **Example 3: Diagnostic model of LUAD using tissue samples**

258 In the LUAD project, the CPTAC-LUAD dataset was used for screening targets and  
259 building the model. The GSE110907 and GSE196633 datasets were used for external  
260 validations. There were 31 targets obtained by conducting the genetic algorithm 100 times,  
261 with a relatively flat frequency distribution shown in **Figure 6A**. Then the top 3 high-  
262 frequency ERRmiR features were selected, and presented significantly differences  
263 between the cancer and control groups ( $P < 0.05$ ) with consistent regulation trends across  
264 multiple datasets (**Figure 6B**). The model trained in the screening set, had high AUC  
265 values of 0.995 and 0.91 in the GSE110907 and GSE196633 validation sets separately  
266 (**Figure 6C**). The five miRNAs comprising the three ERRmiR markers were significantly  
267 enriched in the p53 signaling, Cell cycle, PI3K-Akt pathways and so on, which had been  
268 widely reported to be associated with LUAD[28–30] (**Figure 6D**).

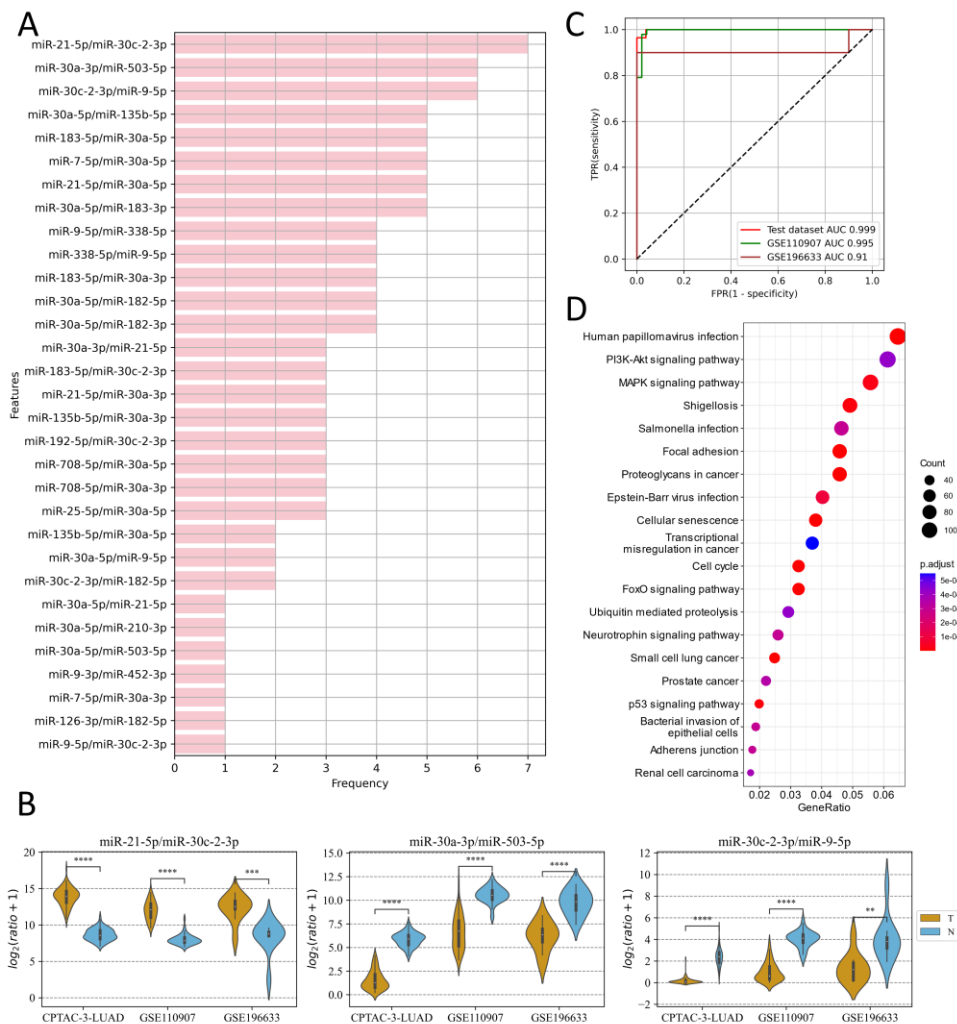

269

270 **Figure 6:** Discovery results on the LUAD project. (A) Statistics of the frequencies of

271 ERRmiR features. (B) Violin plots of ERRmiR features ranked the top 3 by frequency.

272 (C) ROC curves of the models based on ERRmiR markers. (D) Pathway enrichment

273 analysis of miRNAs involved in the ERRmiR markers.

274

## 275 Discussion and Conclusions

276 Using this protocol, we discovered some miRNAs with biological significance in all

277 three examples, reflecting a low discovery rate in the ERRmiR markers. These miRNAs

278 are disease-related and have been validated in previous studies. The results further  
279 demonstrate that the approach of this study is more helpful in implying the pathogenic  
280 mechanisms of diseases.

281 miRNA biomarkers have shown initial success in disease diagnosis and prognosis  
282 monitoring [31], but the uncontrollable experimental factors can cause deviation across  
283 different batches, making it difficult to use normalization of expression matrices alone for  
284 multi-center applications. In this study, we proposed an algorithm based on features  
285 formed by calculating the expression ratio of interacted miRNAs to remove batch effects.  
286 Coordinated with an integrated screening method utilizing the genetic algorithm, the  
287 algorithm can distinguish negative samples from positive samples on data from multi-  
288 sources. We demonstrated the effectiveness of this strategy at tissue and plasma levels  
289 with three examples, indicating its capacity for universal usage in developing diagnosis  
290 and classification models.

291 However, in previous studies, the lack of considering biological significance has led  
292 to improper strategies for construction and screening of expression ratio biomarkers. For  
293 example, some studies constructed expression ratio signatures by matching pairs with an  
294 upgraded gene and a downgrade gene, which ignores many worthy interactions[32,33].  
295 Besides, this DE-dependent method would ignore many worthy interactions, and the  
296 construction method by pairing every two genes makes the number of features explode  
297 extremely, increasing the false discovery rate of targets and bringing tremendous pressure  
298 and difficulty to feature screening on small-sample biological data.

299 To address these issues, we constructed the expression ratio features based on a prior

300 knowledge of miRNA interactions, which not only reduces the dimension of features but  
301 also helps to discover true relation markers. We included three types of miRNA:miRNA  
302 interaction (direct interactions, indirect interactions, and global interactions) summarized  
303 in a previous review[34] and considered the indirect miRNA interactions mediated by  
304 transcription factors. We constructed a TF-mediated miRNA interaction network to guide  
305 the generation of ERRmiR features, and with new miRNA regulatory relationships being  
306 discovered, the interaction network will likely expand, and new markers may gradually  
307 be revealed.

308 An efficient screening strategy is crucial to obtain stable biomarkers with excellent  
309 performance, especially for high-dimensional data and small sample size. In this study,  
310 we demonstrated that the expression ratios of miRNA pairs were more stable relative to  
311 the expression of individual miRNAs, and we preliminarily excluded low-expressed  
312 miRNAs to reduce the false discover rate and the dimension in calculating the feature  
313 matrix. The screening process comprised univariate analyses and multivariate genetic  
314 algorithm, and we repeated the genetic algorithm one hundred times to obtain high-  
315 frequency features, which were considered to be reliable.

316 Using this protocol, we discovered some miRNAs with biological significance in all  
317 three examples, reflecting a low discovery rate in the ERRmiR markers. Let-7b-5p, which  
318 is in a selected marker for predicting severe COVID-19 in the first example, has been  
319 reported to play a role in regulating ACE2 and DPP4 receptors and be significantly  
320 downregulated in nasopharyngeal swabs of patients[35]. Meanwhile, miR-21-3p which

321 is regulated by let-7b-5p, shows an upregulation trend in this project and is consistent  
322 with the previous experiments of mice infected with SARS-CoV-2[36]. miR-106b-3p and  
323 miR-214-5p in the ERRmiR marker that has been selected in the RCC project, are both  
324 found to be critical oncogenes in previous studies. The high expression of miR-106b-3p  
325 may be an important factor in predicting poor prognosis in RCC patients[37,38], and the  
326 overexpression of miR-214-5p attenuates cell proliferation and metastasis[39]. In the  
327 LUAD project, the pairs containing miR-30a-3p or miR-30c-2-3p have been screened out.  
328 The role of the miR-30 family as tumor suppressors has been validated in previous  
329 reports[40], especially miR-30c-2-3p is reported to inhibit tumor progression in  
330 esophageal squamous cell carcinoma, breast cancer, and hepatocellular carcinoma[41–  
331 43]. miR-9-5p and miR-503-5p which are related with miR-30 in the markers, have also  
332 been reported to be associated with cell proliferation, migration, and invasion in non-  
333 small cell lung cancer[44,45]. These miRNAs are disease-related and have been validated  
334 in previous studies. The results further demonstrate that the approach of this study is more  
335 helpful in implying the pathogenic mechanisms of diseases.

336

337

338

339

340

341

## 342 **Declarations**

### 343 **Ethical approval and consent to participate**

344 Ethical approval was not required for this study because we used a public database.

### 345 **Consent to publish**

346 Not applicable.

### 347 **Availability of data and materials**

348 Publicly available datasets were analyzed in this study. This data can be found here:

349 <https://portal.gdc.cancer.gov/> and <http://www.ncbi.nlm.nih.gov/geo/>. The dataset

350 supporting the conclusions of this article is included within the article and its additional

351 file. Source code is also available if required.

### 352 **Competing interests**

353 The authors have declared that no competing interest exists.

### 354 **Funding**

355 This work was supported by the National Natural Science Foundation of China (Grant

356 number 82174531).

### 357 **Authors' contributions**

358 L.X. and C.Y. conceived and supervised the experiments. Y.Z., C.M., and L.X. wrote the

359 manuscript. Y.Z., C.M., R.D. and H.C. performed the experiments. All the authors have

360 read and approved the final manuscript.

361 **Acknowledgements**

362 Not applicable.

363 **Additional file**

364 **Additional file 1**

365 Table S1. A collection of ratio features generated based on transcription factor-mediated  
366 indirect action relationships of miRNAs.

367 **Additional file 2**

368 Table S2. Values of the features in Figure 4B.

369 Table S3. Values of the features in Figure 4C.

370 Table S4. Values of the features in Figure 5B.

371 Table S5. Values of the features in Figure 5C.

372 Table S6. Values of the features in Figure 6B.

373 **References**

374 [1] X. Chen, Y. Ba, L. Ma, X. Cai, Y. Yin, K. Wang, J. Guo, Y. Zhang, J. Chen, X. Guo, Q. Li, X.

375 Li, W. Wang, Y. Zhang, J. Wang, X. Jiang, Y. Xiang, C. Xu, P. Zheng, J. Zhang, R. Li, H. Zhang, X.

376 Shang, T. Gong, G. Ning, J. Wang, K. Zen, J. Zhang, C.-Y. Zhang, Characterization of microRNAs in

377 serum: a novel class of biomarkers for diagnosis of cancer and other diseases, *Cell Res.* 18 (2008)

378 997–1006. <https://doi.org/10.1038/cr.2008.282>.

379 [2] C. Lazar, S. Meganck, J. Taminau, D. Steenhoff, A. Coletta, C. Molter, D.Y. Weiss-Solís, R.

380 Duque, H. Bersini, A. Nowé, Batch effect removal methods for microarray gene expression data

381 integration: a survey, *Brief. Bioinform.* 14 (2013) 469–490. <https://doi.org/10.1093/bib/bbs037>.

- 382 [3] J.T. Leek, R.B. Scharpf, H.C. Bravo, D. Simcha, B. Langmead, W.E. Johnson, D. Geman, K.  
383 Baggerly, R.A. Irizarry, Tackling the widespread and critical impact of batch effects in high-throughput  
384 data, *Nat. Rev. Genet.* 11 (2010) 733–739. <https://doi.org/10.1038/nrg2825>.
- 385 [4] F. Heinicke, X. Zhong, M. Zucknick, J. Breidenbach, A.Y.M. Sundaram, S. T. Flâm, M. Leithaug,  
386 M. Dalland, A. Farmer, J.M. Henderson, M.A. Hussong, P. Moll, L. Nguyen, A. McNulty, J.M. Shaffer,  
387 S. Shore, H.K. Yip, J. Vitkovska, S. Rayner, B.A. Lie, G.D. Gilfillan, Systematic assessment of  
388 commercially available low-input miRNA library preparation kits, *RNA Biol.* 17 (2020) 75–86.  
389 <https://doi.org/10.1080/15476286.2019.1667741>.
- 390 [5] F. Heinicke, X. Zhong, M. Zucknick, J. Breidenbach, A.Y.M. Sundaram, S. T. Flâm, M. Leithaug,  
391 M. Dalland, S. Rayner, B.A. Lie, G.D. Gilfillan, An extension to: Systematic assessment of  
392 commercially available low-input miRNA library preparation kits, *RNA Biol.* 17 (2020) 1284–1292.  
393 <https://doi.org/10.1080/15476286.2020.1761081>.
- 394 [6] S. Ibing, B.E. Michels, M. Mosdzien, H.R. Meyer, L. Feuerbach, C. Körner, On the impact of  
395 batch effect correction in TCGA isomiR expression data, *NAR Cancer.* 3 (2021) zcab007.  
396 <https://doi.org/10.1093/narcan/zcab007>.
- 397 [7] S. Whalen, J. Schreiber, W.S. Noble, K.S. Pollard, Navigating the pitfalls of applying machine  
398 learning in genomics, *Nat. Rev. Genet.* 23 (2022) 169–181. [https://doi.org/10.1038/s41576-021-](https://doi.org/10.1038/s41576-021-00434-9)  
399 [00434-9](https://doi.org/10.1038/s41576-021-00434-9).
- 400 [8] Y. Zhang, P. Patil, W.E. Johnson, G. Parmigiani, Robustifying genomic classifiers to batch  
401 effects via ensemble learning, *Bioinformatics.* 37 (2021) 1521–1527.  
402 <https://doi.org/10.1093/bioinformatics/btaa986>.



- 403 [9] W.W.B. Goh, W. Wang, L. Wong, Why Batch Effects Matter in Omics Data, and How to Avoid  
404 Them, *Trends Biotechnol.* 35 (2017) 498–507. <https://doi.org/10.1016/j.tibtech.2017.02.012>.
- 405 [10] Z. Y, P. G, J. We, ComBat-seq: batch effect adjustment for RNA-seq count data, *NAR Genomics*  
406 *Bioinforma.* 2 (2020). <https://doi.org/10.1093/nargab/lqaa078>.
- 407 [11] M.E. Ritchie, B. Phipson, D. Wu, Y. Hu, C.W. Law, W. Shi, G.K. Smyth, limma powers  
408 differential expression analyses for RNA-sequencing and microarray studies, *Nucleic Acids Res.* 43  
409 (2015) e47–e47. <https://doi.org/10.1093/nar/gkv007>.
- 410 [12] V. Nygaard, E.A. Rødland, E. Hovig, Methods that remove batch effects while retaining group  
411 differences may lead to exaggerated confidence in downstream analyses, *Biostat. Oxf. Engl.* 17 (2016)  
412 29–39. <https://doi.org/10.1093/biostatistics/kxv027>.
- 413 [13] M. Hill, N. Tran, MicroRNAs Regulating MicroRNAs in Cancer, *Trends Cancer.* 4 (2018) 465–  
414 468. <https://doi.org/10.1016/j.trecan.2018.05.002>.
- 415 [14] R. Vishnubalaji, H. Shaath, M. Al-Alwan, E.M. Abdelalim, N.M. Alajez, Reciprocal interplays  
416 between MicroRNAs and pluripotency transcription factors in dictating stemness features in human  
417 cancers, *Semin. Cancer Biol.* 87 (2022) 1–16. <https://doi.org/10.1016/j.semcancer.2022.10.007>.
- 418 [15] T. Tao, Y. Wang, H. Luo, L. Yao, L. Wang, J. Wang, W. Yan, J. Zhang, H. Wang, Y. Shi, Y. Yin,  
419 T. Jiang, C. Kang, N. Liu, Y. You, Involvement of FOS-mediated miR-181b/miR-21 signalling in the  
420 progression of malignant gliomas, *Eur. J. Cancer Oxf. Engl.* 1990. 49 (2013) 3055–3063.  
421 <https://doi.org/10.1016/j.ejca.2013.05.010>.
- 422 [16] C. Borzi, L. Calzolari, G. Centonze, M. Milione, G. Sozzi, O. Fortunato, mir-660-p53-mir-486  
423 Network: A New Key Regulatory Pathway in Lung Tumorigenesis, *Int. J. Mol. Sci.* 18 (2017) 222.

- 424 <https://doi.org/10.3390/ijms18010222>.
- 425 [17] H.-Y. Huang, Y.-C.-D. Lin, J. Li, K.-Y. Huang, S. Shrestha, H.-C. Hong, Y. Tang, Y.-G. Chen,  
426 C.-N. Jin, Y. Yu, J.-T. Xu, Y.-M. Li, X.-X. Cai, Z.-Y. Zhou, X.-H. Chen, Y.-Y. Pei, L. Hu, J.-J. Su, S.-  
427 D. Cui, F. Wang, Y.-Y. Xie, S.-Y. Ding, M.-F. Luo, C.-H. Chou, N.-W. Chang, K.-W. Chen, Y.-H.  
428 Cheng, X.-H. Wan, W.-L. Hsu, T.-Y. Lee, F.-X. Wei, H.-D. Huang, miRTarBase 2020: updates to the  
429 experimentally validated microRNA-target interaction database, *Nucleic Acids Res.* 48 (2020) D148–  
430 D154. <https://doi.org/10.1093/nar/gkz896>.
- 431 [18] Q. Zhang, W. Liu, H.-M. Zhang, G.-Y. Xie, Y.-R. Miao, M. Xia, A.-Y. Guo, hTFtarget: A  
432 Comprehensive Database for Regulations of Human Transcription Factors and Their Targets,  
433 *Genomics Proteomics Bioinformatics.* 18 (2020) 120–128. <https://doi.org/10.1016/j.gpb.2019.09.006>.
- 434 [19] H. Hu, Y.-R. Miao, L.-H. Jia, Q.-Y. Yu, Q. Zhang, A.-Y. Guo, AnimalTFDB 3.0: a comprehensive  
435 resource for annotation and prediction of animal transcription factors, *Nucleic Acids Res.* 47 (2019)  
436 D33–D38. <https://doi.org/10.1093/nar/gky822>.
- 437 [20] Z. Tong, Q. Cui, J. Wang, Y. Zhou, TransmiR v2.0: an updated transcription factor-microRNA  
438 regulation database, *Nucleic Acids Res.* 47 (2019) D253–D258. <https://doi.org/10.1093/nar/gky1023>.
- 439 [21] E. Clough, T. Barrett, The Gene Expression Omnibus Database, *Methods Mol. Biol.* Clifton NJ.  
440 1418 (2016) 93–110. [https://doi.org/10.1007/978-1-4939-3578-9\\_5](https://doi.org/10.1007/978-1-4939-3578-9_5).
- 441 [22] M.A. Jensen, V. Ferretti, R.L. Grossman, L.M. Staudt, The NCI Genomic Data Commons as an  
442 engine for precision medicine, *Blood.* 130 (2017) 453–459. [https://doi.org/10.1182/blood-2017-03-](https://doi.org/10.1182/blood-2017-03-735654)  
443 735654.
- 444 [23] N.J. Edwards, M. Oberti, R.R. Thangudu, S. Cai, P.B. McGarvey, S. Jacob, S. Madhavan, K.A.

- 445 Ketchum, The CPTAC Data Portal: A Resource for Cancer Proteomics Research, *J. Proteome Res.* 14  
446 (2015) 2707–2713. <https://doi.org/10.1021/pr501254j>.
- 447 [24] C. Hutter, J.C. Zenklusen, The Cancer Genome Atlas: Creating Lasting Value beyond Its Data,  
448 *Cell.* 173 (2018) 283–285. <https://doi.org/10.1016/j.cell.2018.03.042>.
- 449 [25] J. Rozowsky, R.R. Kitchen, J.J. Park, T.R. Galeev, J. Diao, J. Warrell, W. Thistlethwaite, S.L.  
450 Subramanian, A. Milosavljevic, M. Gerstein, exceRpt: A Comprehensive Analytic Platform for  
451 Extracellular RNA Profiling, *Cell Syst.* 8 (2019) 352–357.e3.  
452 <https://doi.org/10.1016/j.cels.2019.03.004>.
- 453 [26] K.V. Gurova, J.E. Hill, O.V. Razorenova, P.M. Chumakov, A.V. Gudkov, p53 pathway in renal  
454 cell carcinoma is repressed by a dominant mechanism, *Cancer Res.* 64 (2004) 1951–1958.  
455 <https://doi.org/10.1158/0008-5472.can-03-1541>.
- 456 [27] Y. Guan, Z. Gong, T. Xiao, Z. Li, Knockdown of miR-572 suppresses cell proliferation and  
457 promotes apoptosis in renal cell carcinoma cells by targeting the NF2/Hippo signaling pathway, *Int. J.*  
458 *Clin. Exp. Pathol.* 11 (2018) 5705–5714.
- 459 [28] X. Huang, L. Jiang, S. Lu, M. Yuan, H. Lin, B. Li, Z. Wen, Y. Zhong, Overexpression of  
460 ERCC6L correlates with poor prognosis and confers malignant phenotypes of lung adenocarcinoma,  
461 *Oncol. Rep.* 48 (2022) 131. <https://doi.org/10.3892/or.2022.8342>.
- 462 [29] H. Tang, J. Liu, J. Huang, GMFG (glia maturation factor gamma) inhibits lung cancer growth  
463 by activating p53 signaling pathway, *Bioengineered.* 13 (2022) 9284–9293.  
464 <https://doi.org/10.1080/21655979.2022.2049958>.
- 465 [30] N. Zhang, S. Cao, R. Sun, Y. Wang, L. Liu, W. Wang, X. Meng, Signal peptidase 21 suppresses

466 cell proliferation, migration, and invasion via the PTEN-PI3K/Akt signaling pathway in lung  
467 adenocarcinoma, *PeerJ*. 10 (2022) e14206. <https://doi.org/10.7717/peerj.14206>.

468 [31] J. Inoue, J. Inazawa, Cancer-associated miRNAs and their therapeutic potential, *J. Hum. Genet.*  
469 66 (2021) 937–945. <https://doi.org/10.1038/s10038-021-00938-6>.

470 [32] J. Zhang, G.S. Raju, D.W. Chang, S.-H. Lin, Z. Chen, X. Wu, Global and targeted circulating  
471 microRNA profiling of colorectal adenoma and colorectal cancer, *Cancer*. 124 (2018) 785–796.  
472 <https://doi.org/10.1002/cncr.31062>.

473 [33] A.E. Szafranska, T.S. Davison, J. John, T. Cannon, B. Sipos, A. Maghnouj, E. Labourier, S.A.  
474 Hahn, MicroRNA expression alterations are linked to tumorigenesis and non-neoplastic processes in  
475 pancreatic ductal adenocarcinoma, *Oncogene*. 26 (2007) 4442–4452.  
476 <https://doi.org/10.1038/sj.onc.1210228>.

477 [34] M. Hill, N. Tran, miRNA interplay: mechanisms and consequences in cancer, *Dis. Model. Mech.*  
478 14 (2021) dmm047662. <https://doi.org/10.1242/dmm.047662>.

479 [35] A. Latini, C. Vancheri, F. Amati, E. Morini, S. Grelli, C. Matteucci, V. Petrone, V.L. Colona, M.  
480 Murdocca, M. Andreoni, V. Malagnino, M. Raponi, D. Cocciadiferro, A. Novelli, P. Borgiani, G.  
481 Novelli, Expression analysis of miRNA hsa-let7b-5p in naso-oropharyngeal swabs of COVID-19  
482 patients supports its role in regulating ACE2 and DPP4 receptors, *J. Cell. Mol. Med.* 26 (2022) 4940–  
483 4948. <https://doi.org/10.1111/jcmm.17492>.

484 [36] S. Nersisyan, N. Engibaryan, A. Gorbonos, K. Kirdey, A. Makhonin, A. Tonevitsky, Potential  
485 role of cellular miRNAs in coronavirus-host interplay, *PeerJ*. 8 (2020) e9994.  
486 <https://doi.org/10.7717/peerj.9994>.

- 487 [37] Y. Li, D. Chen, Z. Su, Y. Li, J. Liu, L. Jin, M. Shi, Z. Jiang, Z. Qi, Y. Gui, S. Yang, X. Mao, X.  
488 Wu, Y. Lai, MicroRNA-106b functions as an oncogene in renal cell carcinoma by affecting cell  
489 proliferation, migration and apoptosis, *Mol. Med. Rep.* 13 (2016) 1420–1426.  
490 <https://doi.org/10.3892/mmr.2015.4656>.
- 491 [38] K. Liu, X. Pan, X. Peng, C. Zhang, H. Li, X. Guan, W. Xu, J. Xu, L. Zhao, T. Wang, Y. Lai,  
492 Associations of high expression of miR-106b-5p detected from FFPE sample with poor prognosis of  
493 RCC patients, *Pathol. Res. Pract.* 215 (2019) 152391. <https://doi.org/10.1016/j.prp.2019.03.019>.
- 494 [39] R. Guo, B. Zou, Y. Liang, J. Bian, J. Xu, Q. Zhou, C. Zhang, T. Chen, M. Yang, H. Wang, F. Pei,  
495 Z. Xu, LncRNA RCAT1 promotes tumor progression and metastasis via miR-214-5p/E2F2 axis in  
496 renal cell carcinoma, *Cell Death Dis.* 12 (2021) 1–14. <https://doi.org/10.1038/s41419-021-03955-7>.
- 497 [40] A.D. Saleh, H. Cheng, S.E. Martin, H. Si, P. Ormanoglu, S. Carlson, P.E. Clavijo, X. Yang, R.  
498 Das, S. Cornelius, J. Couper, D. Chepeha, L. Danilova, T.M. Harris, M.B. Prystowsky, G.J. Childs,  
499 R.V. Smith, A.G. Robertson, S.J.M. Jones, A.D. Cherniack, S.S. Kim, A. Rait, K.F. Pirolo, E.H. Chang,  
500 Z. Chen, C. Van Waes, Integrated Genomic and Functional microRNA Analysis Identifies miR-30-5p  
501 as a Tumor Suppressor and Potential Therapeutic Nanomedicine in Head and Neck Cancer, *Clin.*  
502 *Cancer Res. Off. J. Am. Assoc. Cancer Res.* 25 (2019) 2860–2873. [https://doi.org/10.1158/1078-](https://doi.org/10.1158/1078-0432.CCR-18-0716)  
503 [0432.CCR-18-0716](https://doi.org/10.1158/1078-0432.CCR-18-0716).
- 504 [41] T. Ma, Y. Zhao, Q. Lu, Y. Lu, Z. Liu, T. Xue, Y. Shao, MicroRNA-30c functions as a tumor  
505 suppressor via targeting SNAIL in esophageal squamous cell carcinoma, *Biomed. Pharmacother.*  
506 *Biomedecine Pharmacother.* 98 (2018) 680–686. <https://doi.org/10.1016/j.biopha.2017.12.095>.
- 507 [42] H.-D. Zhang, L.-H. Jiang, J.-C. Hou, S.-Y. Zhou, S.-L. Zhong, L.-P. Zhu, D.-D. Wang, S.-J. Yang,

508 Y.-J. He, C.-F. Mao, Y. Yang, J.-Y. Wang, Q. Zhang, H.-Z. Xu, D.-D. Yu, J.-H. Zhao, J.-H. Tang, Z.-L.  
509 Ji, Circular RNA hsa\_circ\_0072995 promotes breast cancer cell migration and invasion through  
510 sponge for miR-30c-2-3p, *Epigenomics*. 10 (2018) 1229–1242. <https://doi.org/10.2217/epi-2018-0002>.  
511 [43] J. Zhang, M. Cai, D. Jiang, L. Xu, Upregulated LncRNA-CCAT1 promotes hepatocellular  
512 carcinoma progression by functioning as miR-30c-2-3p sponge, *Cell Biochem. Funct.* 37 (2019) 84–  
513 92. <https://doi.org/10.1002/cbf.3375>.  
514 [44] Y. Sun, L. Li, S. Xing, Y. Pan, Y. Shi, L. Zhang, Q. Shen, miR-503-3p induces apoptosis of lung  
515 cancer cells by regulating p21 and CDK4 expression, *Cancer Biomark. Sect. Dis. Markers*. 20 (2017)  
516 597–608. <https://doi.org/10.3233/CBM-170585>.  
517 [45] K. Zhu, J. Lin, S. Chen, Q. Xu, miR-9-5p Promotes Lung Adenocarcinoma Cell Proliferation,  
518 Migration and Invasion by Targeting ID4, *Technol. Cancer Res. Treat.* 20 (2021) 15330338211048592.  
519 <https://doi.org/10.1177/15330338211048592>.  
520
